# Supplementary material
Source: Springer Nature journal article supplement (https://www.springermedizin.de/resource/supplementary/13075_2009_2737_MOESM6_ESM.pdf/9692774)

**(a)** **$\alpha$ -SMA Gene-Expression**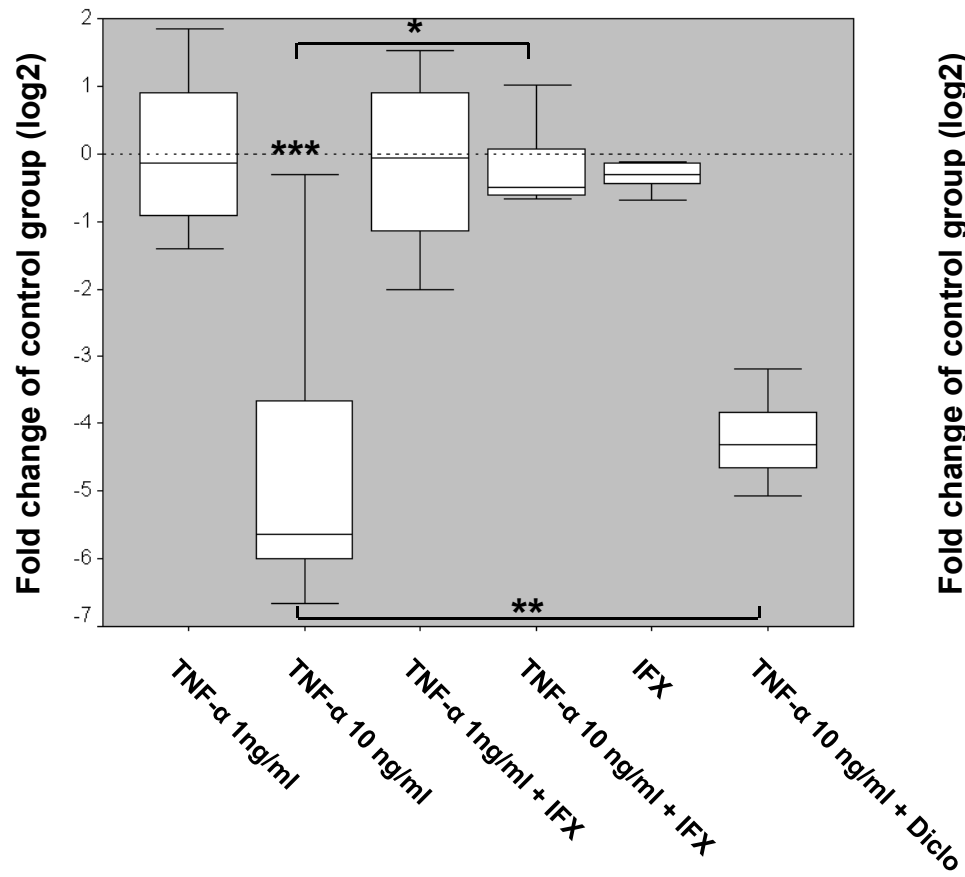**(b)****Collagen-1 Gene-Expression**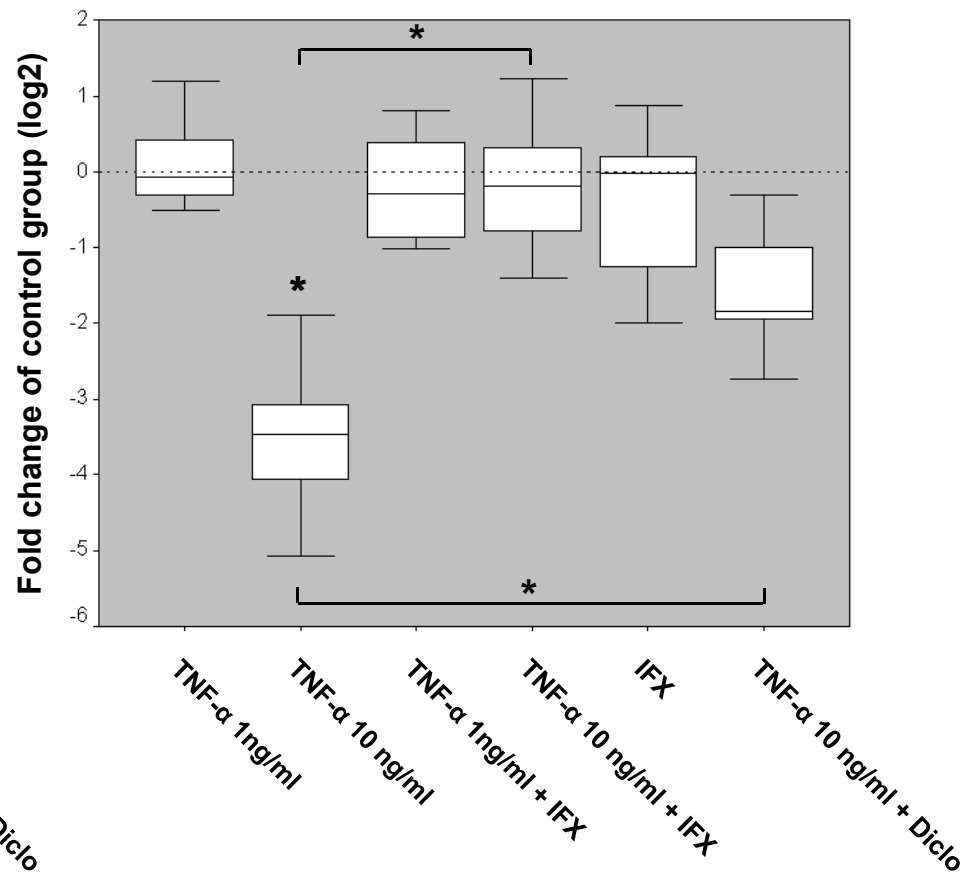

Supplement: MOESM6 [file 9692774]
